# Supplementary material for: Preparation and structure of Fe-containing aluminosilicate thin films
Source: Royal Society of Chemistry journal article supplement (doi:10.1039/c6cp03460h), 2016-01-01
Supplement: c6cp03460h1.pdf [file c6cp03460h1.pdf]

## Supporting information

to the paper

### Preparation and structure of Fe-containing aluminosilicate thin films

Héloïse Tissot, Linfei Li, Shamil Shaikhutdinov, Hans-Joachim Freund

*Department of Chemical Physics, Fritz Haber Institute, Faradayweg 4-6, 14195 Berlin, Germany*

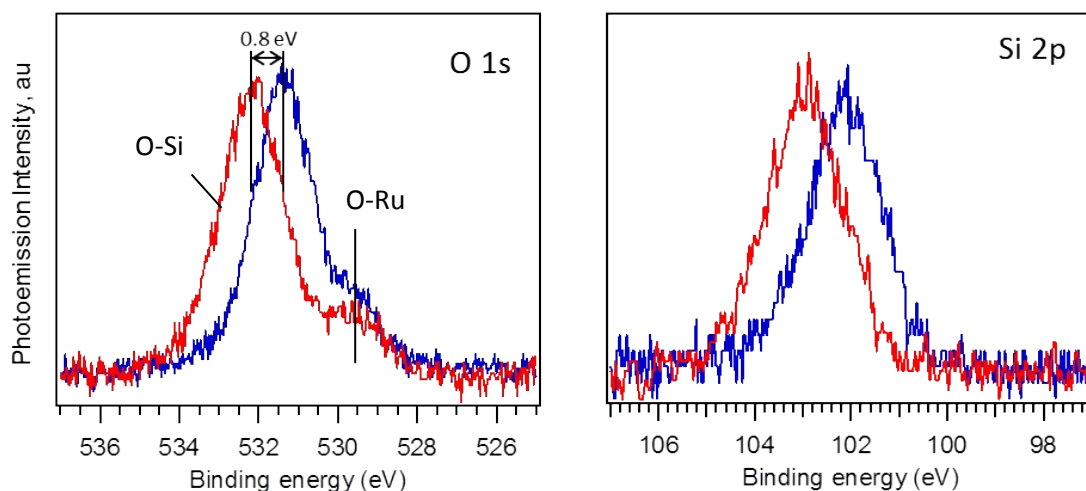

**Figure S1.** O 1s and Si 2p regions in XP spectra of the silicate bilayer film before (blue) and after (red) 1 ML Fe deposition at 100 K. Note that the signal related to O atoms adsorbed on the Ru surface does not shift.

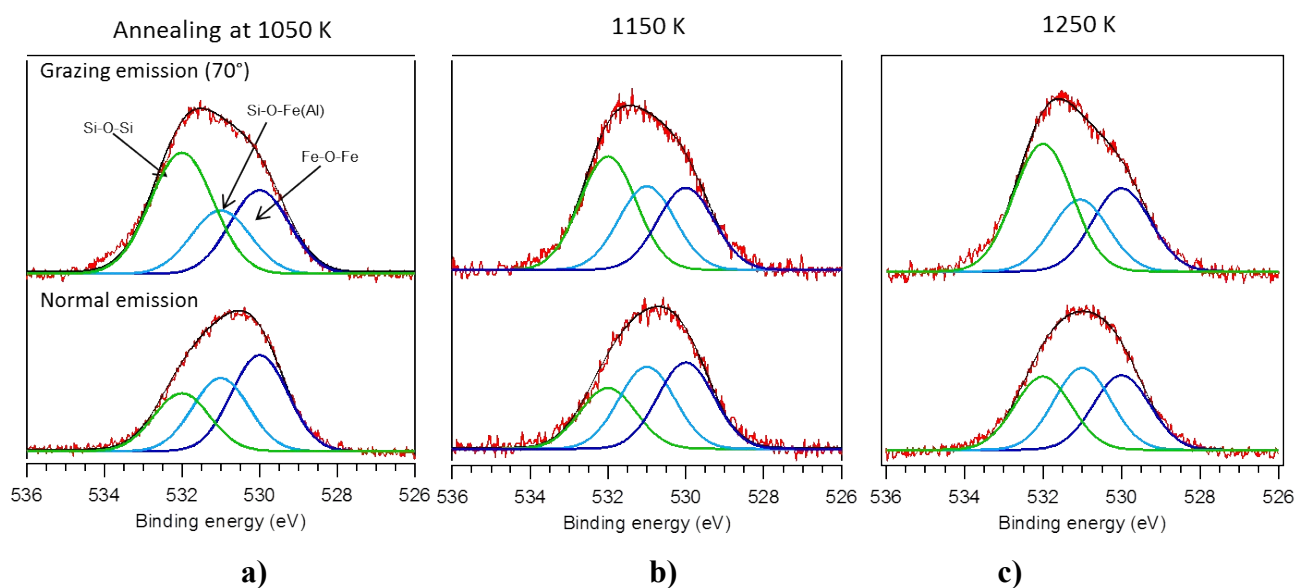

**Figure S2.** The deconvoluted O 1s spectra at normal and grazing ( $70^\circ$ ) electron emissions obtained on the  $\text{Fe}_{0.5}\text{Al}_{0.13}\text{Si}_{0.37}\text{O}_2$  films prepared at 1050 (a), 1150 (b), and 1250 K (c).

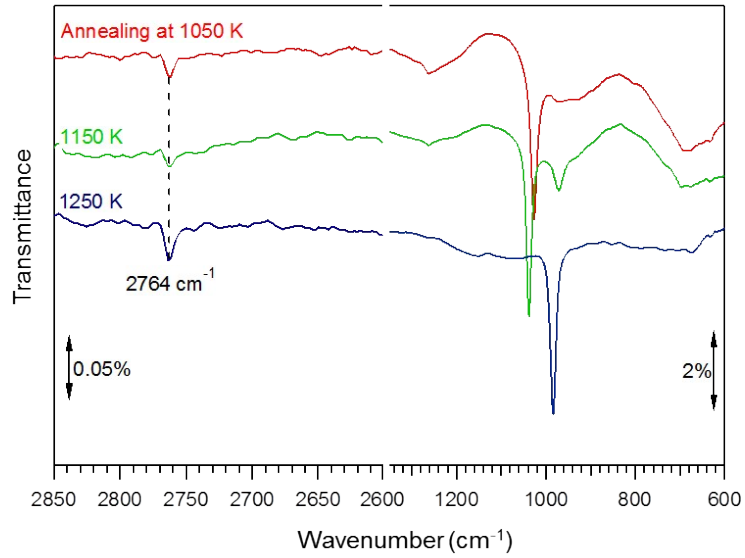

**Figure S3.**  $\nu(\text{OD})$  region and phonon region of IRA spectra measured on  $\text{Fe}_{0.5}\text{Al}_{0.13}\text{Si}_{0.37}\text{O}_2$  films (prepared at temperatures as indicated) after hydroxylation with  $\text{D}_2\text{O}$ . The spectra only revealed a band at  $2764 \text{ cm}^{-1}$  characteristic for terminal silanols.
